# Supplementary material
Source: PubMed Central journal article supplement (PMC3446855)

Figure 1A

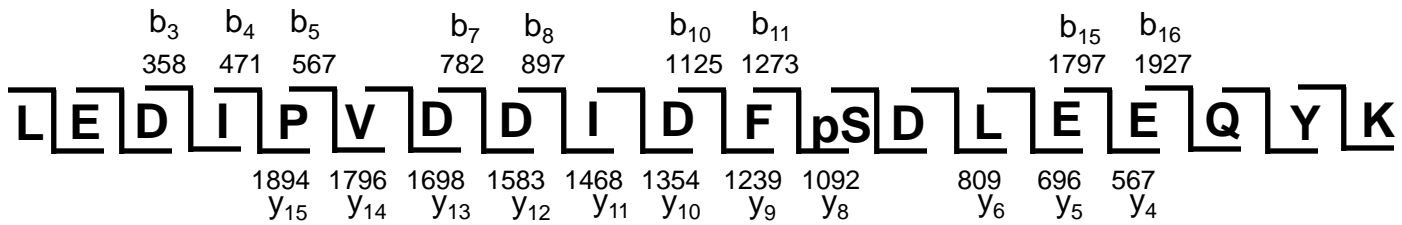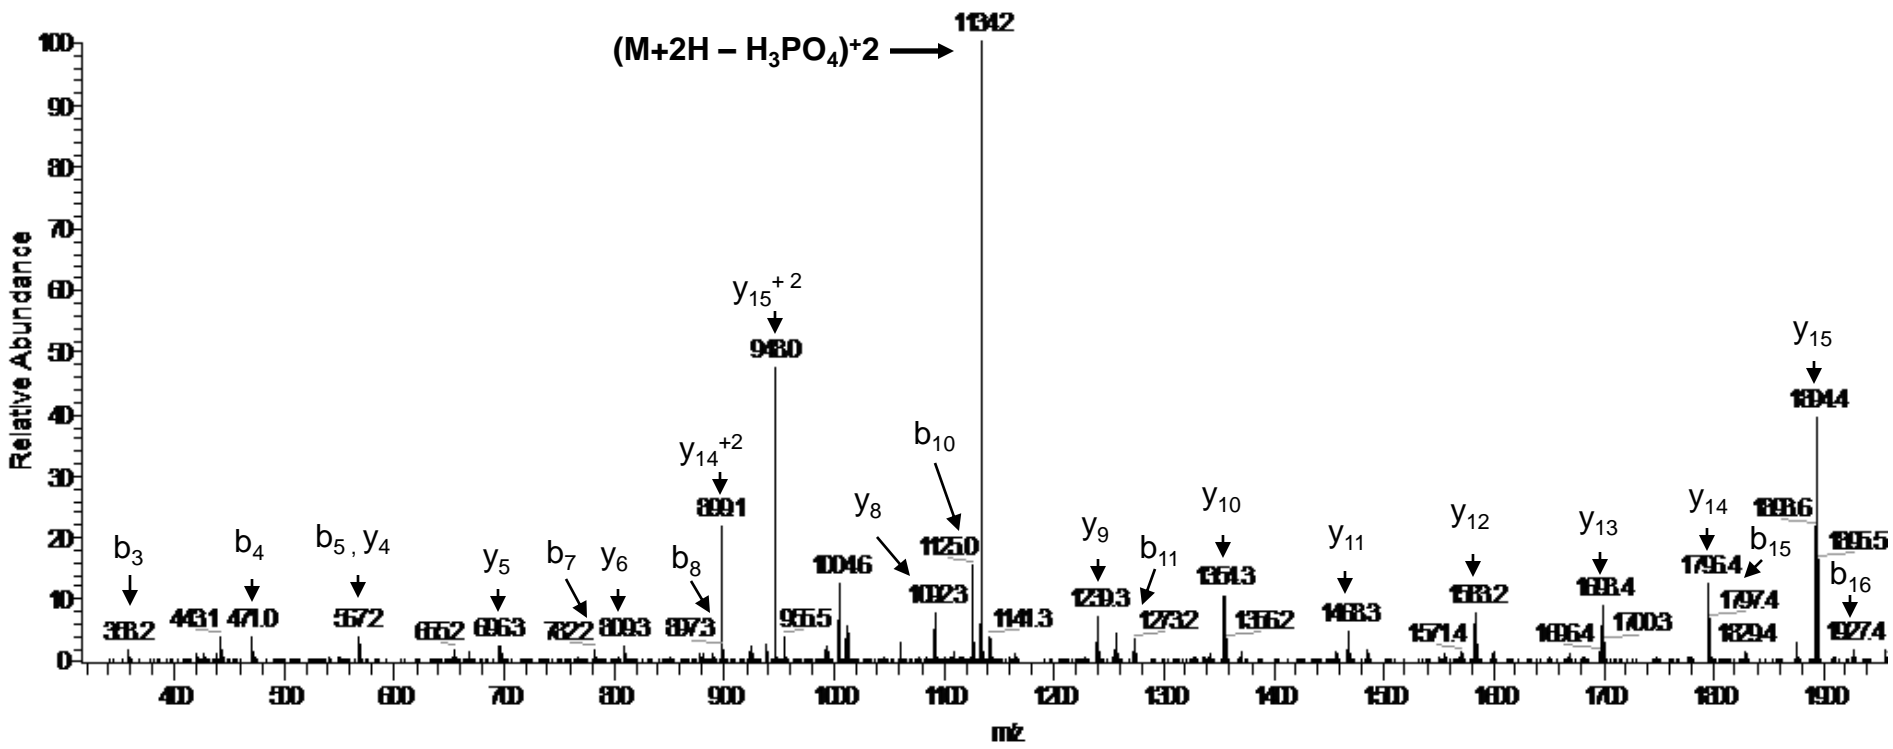

Figure 1B

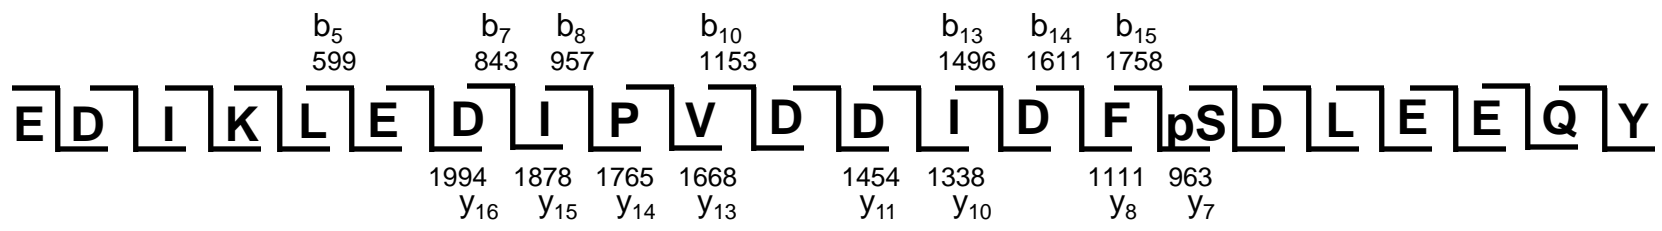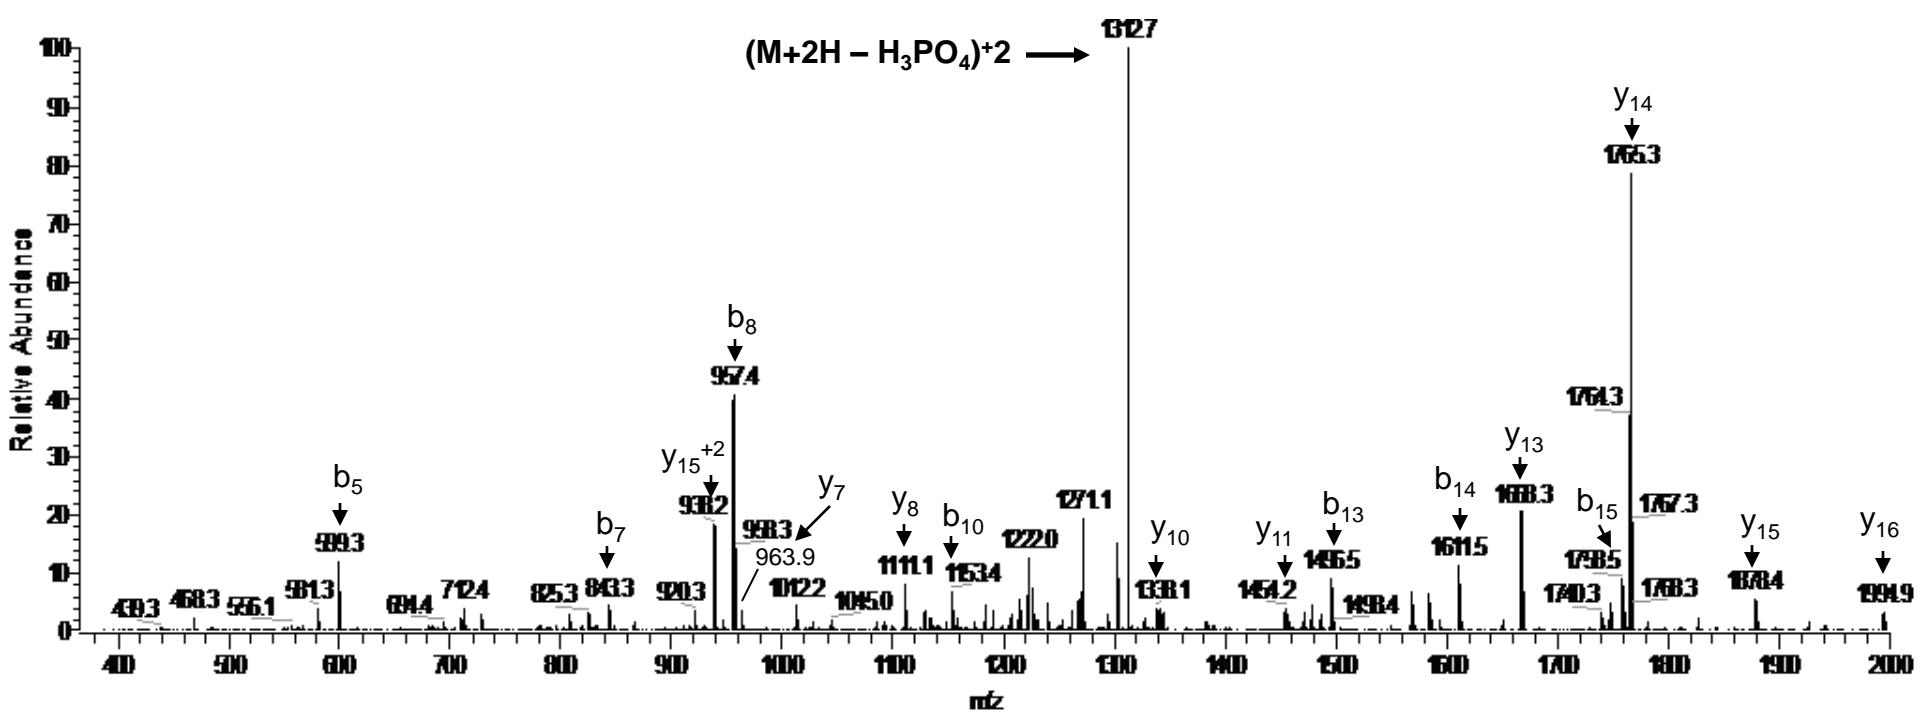

Figure 1C

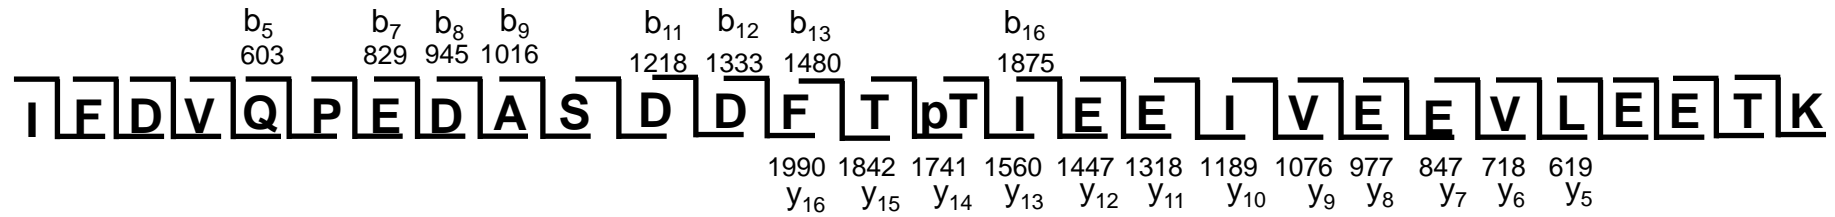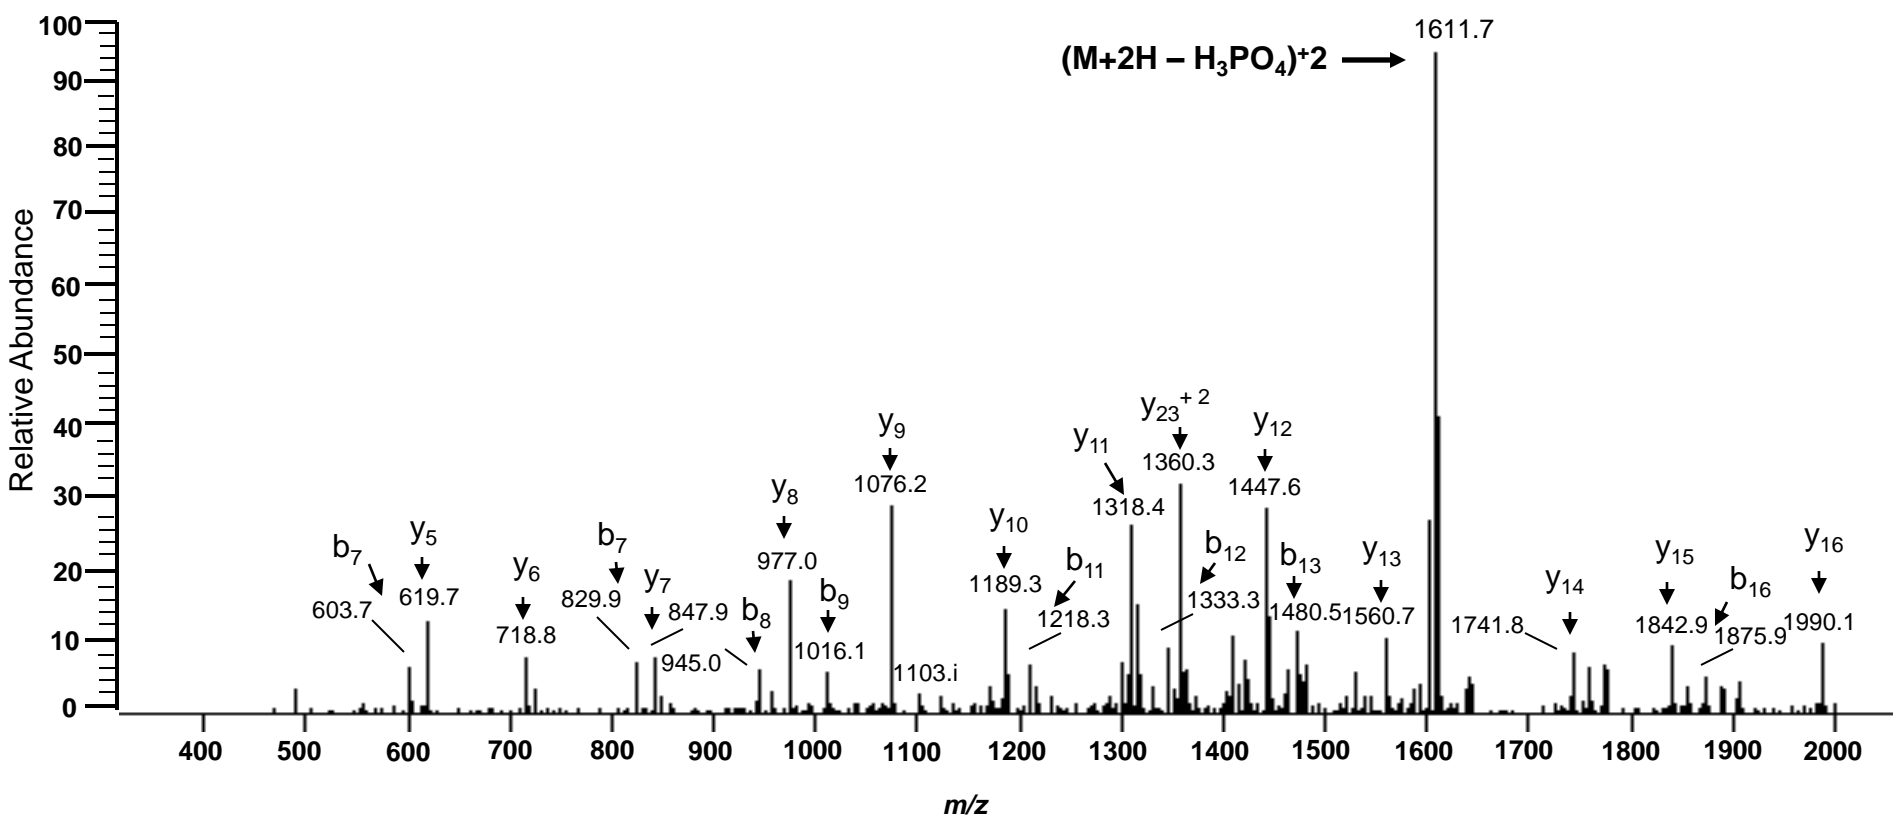

**Figure 1D**

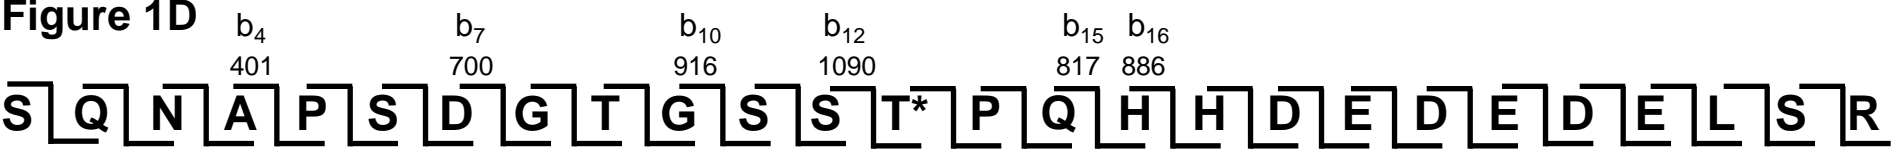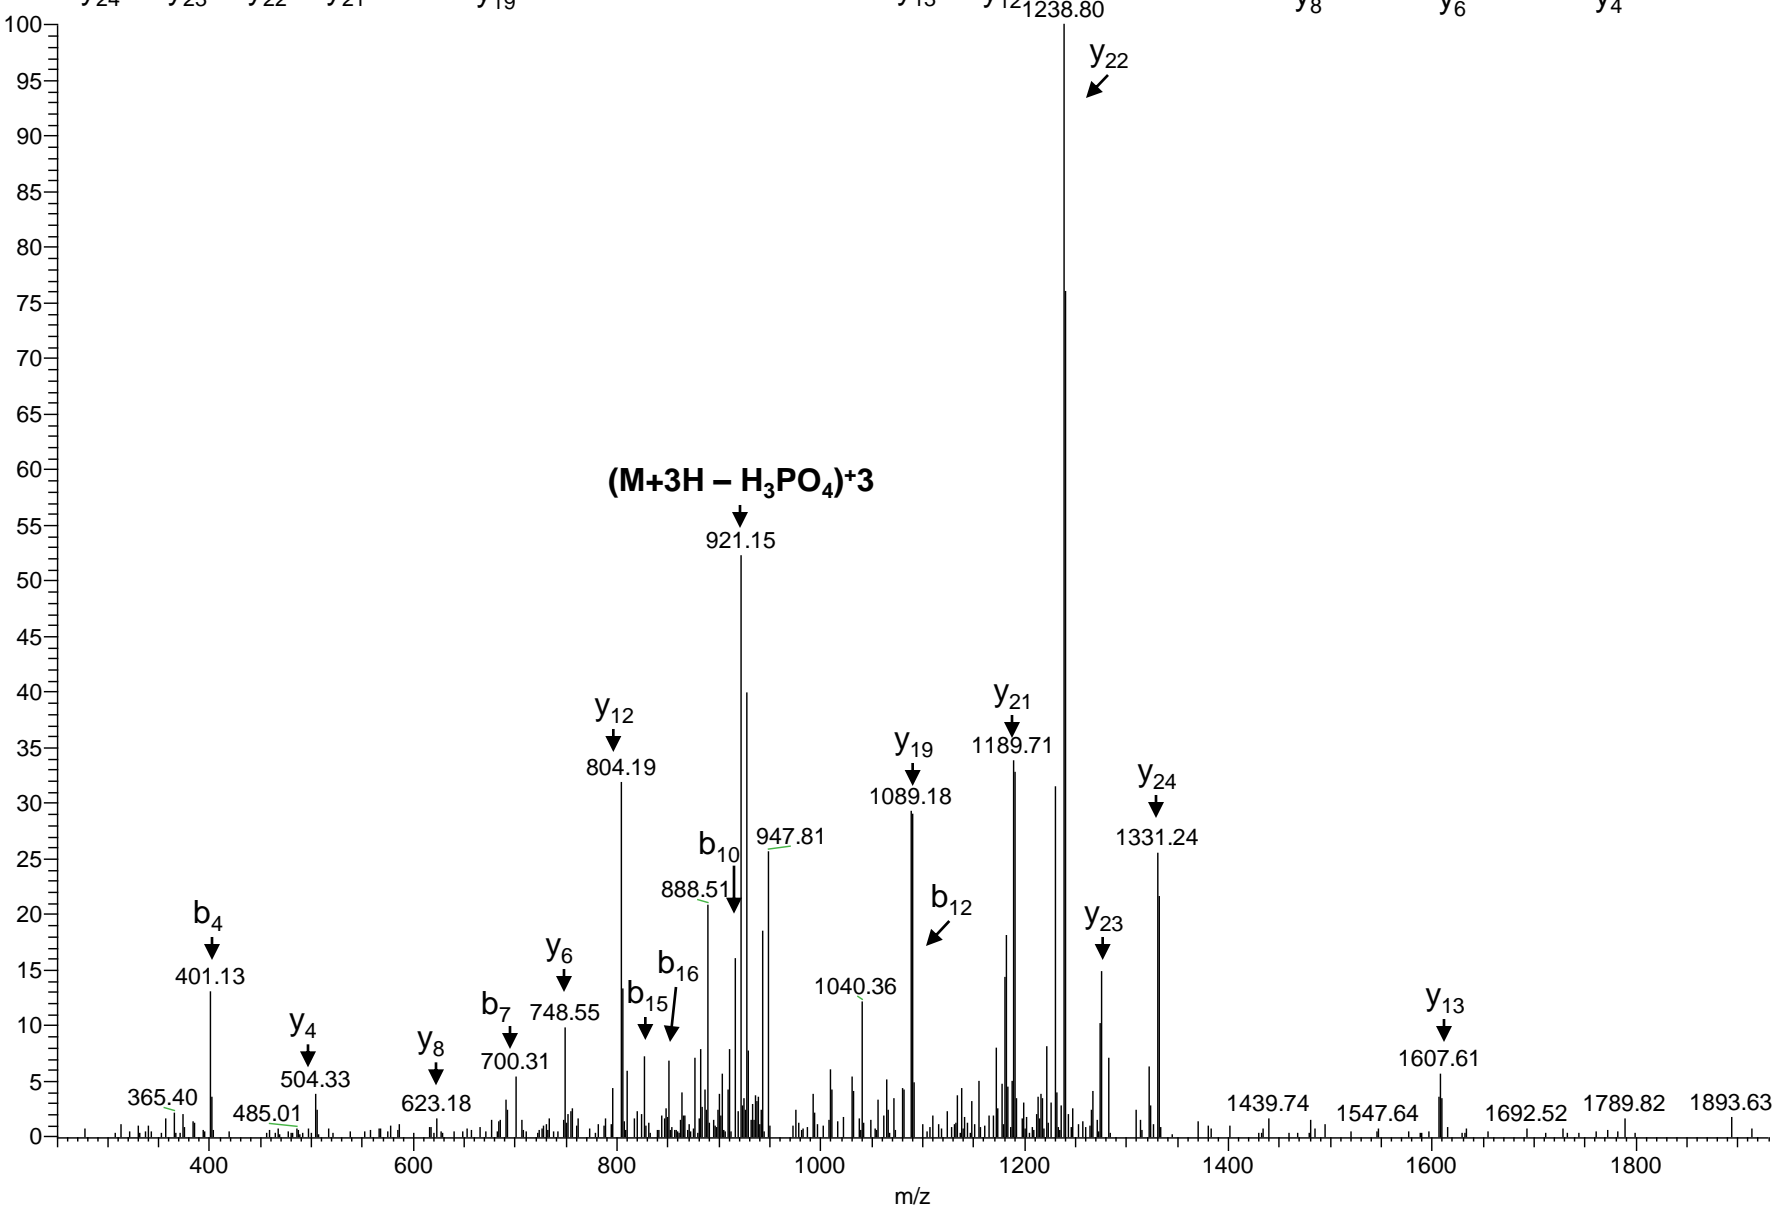

Supplement: NIHMS277640-supplement-1_si_001.pdf [file NIHMS277640-supplement-1_si_001.pdf]
